# Supplementary material for: Temporal persistence of postfire flood hazards under present and future climate conditions in southern Arizona, USA
Source: Copernicus journal article supplement (doi:10.5194/nhess-2024-151), 2024-09-23
Supplement: Supplementary file 1 [file nhess-2024-151-supplement.pdf]

supplementary material of

# **Temporal persistence of postfire flash flood hazards under present and future climate conditions in southern Arizona, USA**

Tao Liu<sup>1</sup>, Luke A. McGuire<sup>2</sup>, Ann M. Youberg<sup>3</sup>, Charles J. Abolt<sup>1</sup>, Adam L. Atchley<sup>1</sup>

<sup>1</sup>Earth and Environmental Sciences Division, Los Alamos National Laboratory, Los Alamos, NM 87545, USA

<sup>2</sup>Department of Geosciences, University of Arizona, Tucson, AZ 85721-0011, USA

<sup>3</sup>Arizona Geological Survey, University of Arizona, Tucson, AZ 85721-0011, USA

## **Contents of this file**

Figures S1 to S3

## **Introduction**

This document includes three supplementary figures.

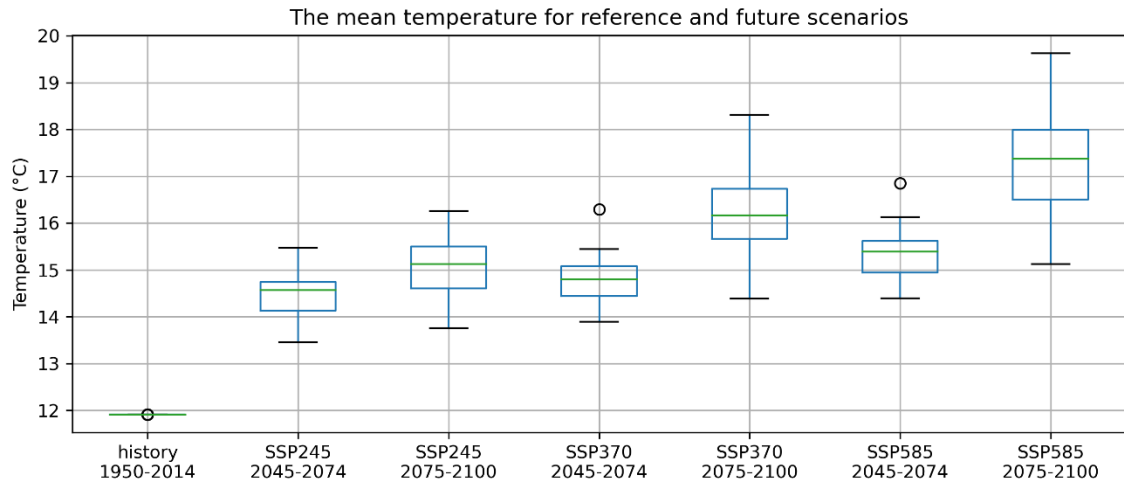

**Figure S1. The average temperature in reference and future scenarios for the upper Cañada del Oro (CDO) watershed as computed from LOCA2.**

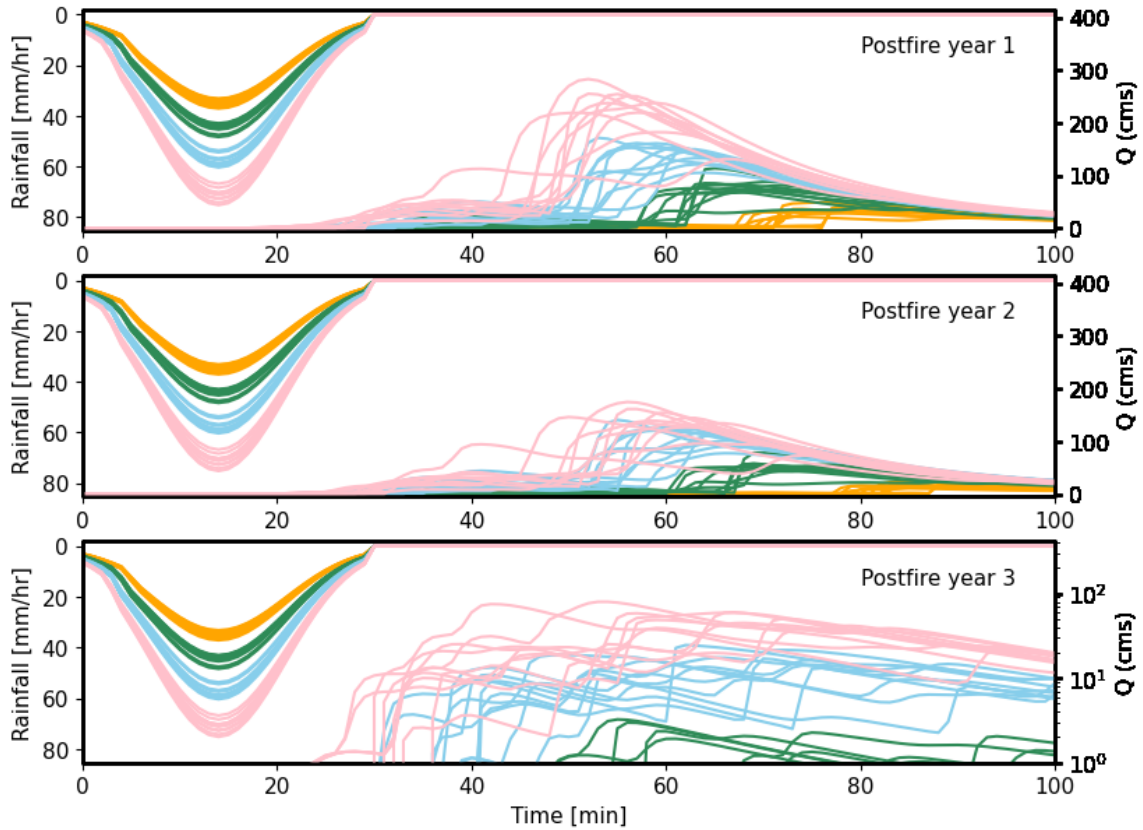

**Figure S2. Rainfall-runoff simulations for design storms with average recurrence intervals of 1- (orange line), 2- (green line), 5- (blue line), and 10-year (pink line) under the reference scenario (Historical, 1950-2014), 50% rainfall coverage, three postfire years, and 30 random rainfall location configurations.**

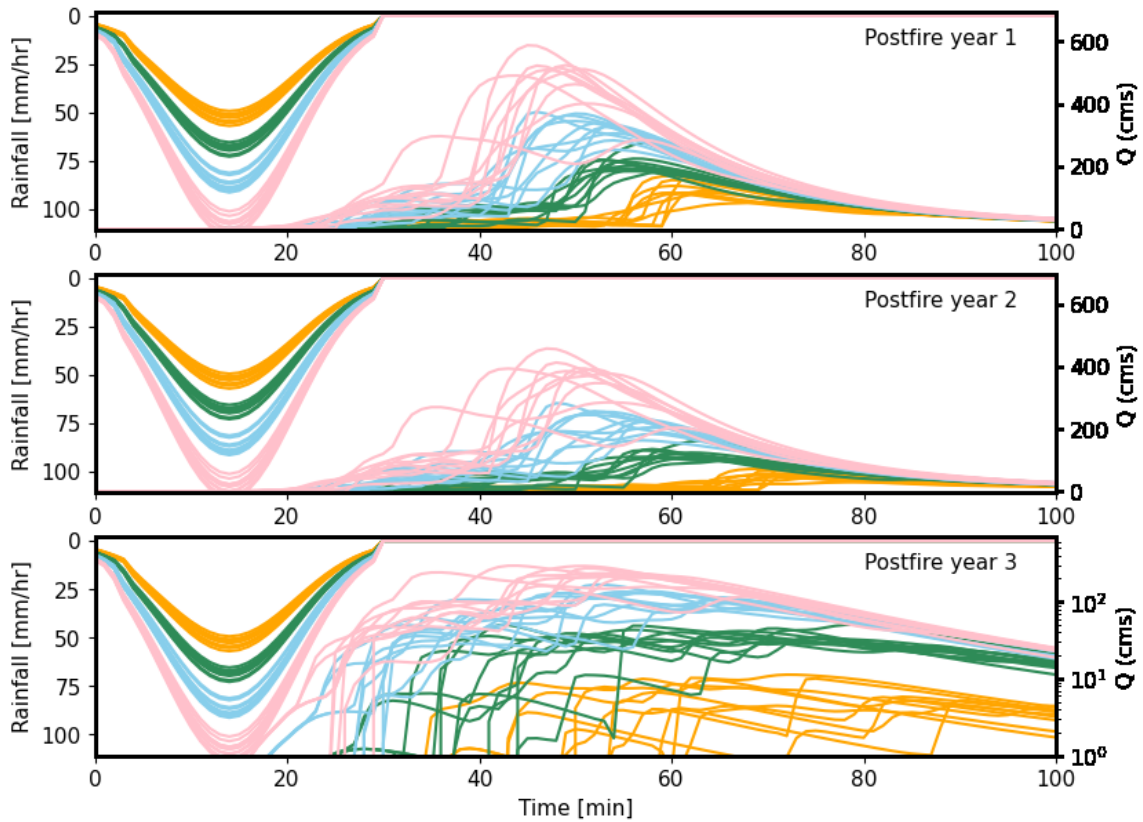

**Figure S3. Rainfall-runoff simulations for design storms with average recurrence intervals of 1- (orange line), 2- (green line), 5- (blue line), and 10-year (pink line) under the SSP585, late 21<sup>st</sup> century scenario (2075-2100), 50% rainfall coverage, three postfire years, and 30 random rainfall location configurations.**
