# Supplementary material for: Temporal persistence of postfire flood hazards under present and future climate conditions in southern Arizona, USA
Source: Copernicus journal article supplement (doi:10.5194/nhess-2024-151), 2024-09-23
Supplement: Supplementary file [file nhess-2024-151-RC1-supplement.pdf]

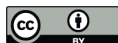

# Temporal persistence of postfire flood hazards under present and future climate conditions in southern Arizona, USA

Tao Liu<sup>1</sup>, Luke A. McGuire<sup>2</sup>, Ann M. Youberg<sup>3</sup>, Charles J. Abolt<sup>1</sup>, Adam L. Atchley<sup>1</sup>

<sup>1</sup>Earth and Environmental Sciences Division, Los Alamos National Laboratory, Los Alamos, NM 87545, USA

5 <sup>2</sup>Department of Geosciences, University of Arizona, Tucson, AZ 85721-0011, USA

<sup>3</sup>Arizona Geological Survey, University of Arizona, Tucson, AZ 85721-0011, USA

Correspondence to: Tao Liu (taoliu@lanl.gov)

**Abstract.** Changes to soil hydraulic properties that reduce infiltration capacity following fire can increase flash flood risks. These risks are exacerbated by rainfall intensification associated with a warming climate. However, the potential effects of climate-change-driven rainfall intensification on postfire floods remain largely unexplored. Using rainfall and runoff observations from a 49.4 km<sup>2</sup> watershed in southern Arizona, USA, and a hydrological model (KINEROS2), we examined the temporal evolution following a historic fire of three crucial hydrologic parameters: soil saturated hydraulic conductivity ( $K_{sp}$ ), net capillary drive ( $G_p$ ), and hydraulic roughness ( $n_c$ ). We explored how the effect of fire on these parameters may influence peak flow under future climate scenarios derived from CMIP6, specifically the medium emissions scenario (SSP245) and high emissions scenario (SSP585). Results demonstrate an increase in  $K_{sp}$  from 11 mm/hr in the first postfire year to 60 mm/hr in postfire year three.  $G_p$  similarly increased from 19 mm in the first postfire year to 30 mm in the third, while  $n_c$  was relatively constant. The highest simulated  $Q_p$  occurred in the first postfire year. Under the SSP245 scenario, the likelihood of a 100-yr flood is projected to be twice as large by the middle century relative to its historical magnitude. Simulations further indicate that the maximum expected discharge associated with a postfire flood, as derived from historical data, could be triggered by a 10-yr rainstorm under the SSP585 scenario by the late century. Simulations also demonstrate that rainfall intensification will lead to greater persistence of elevated flood hazards following fire by late century under both the SSP245 and SSP585 scenarios.

## 1 Introduction

Effects of moderate and high severity fire on soil and vegetation promote increases in runoff and erosion (McGuire et al., 2024; Moody et al., 2013; Robichaud et al., 2016), which alters watershed responses to rainfall (Cannon et al., 2008). Modest rainfall can trigger floods and debris flows in recently burned areas (Esposito et al., 2023), with more extreme rainfall having the potential for devastating impacts on areas downstream (Kean et al., 2019; Lancaster et al., 2021). Increases in fire activity (Boer et al., 2016; Canadell et al., 2021; Senande-Rivera et al., 2022) and rainfall intensification (Westra et al., 2014; Fowler et al., 2021) driven by climate change have the potential to further exacerbate postfire flow hazards in the coming decades (Kean and Staley, 2021). Hydrologic models are a valuable tool for quantifying fire effects and assessing postfire flow hazards (McLin et al., 2001; Wu et al., 2021; Li et al., 2022; Liu et al., 2022; Yu et al., 2023),



including how they may change under future climate scenarios. However, our ability to use hydrologic models for predicting and mitigating post-fire flow hazards would be improved by a better understanding of how to update model parameters after a fire. This includes both the immediate changes following a fire and their temporal evolution as a function of time since the  
35 burn (Cydzyk and Hogue, 2009; Ebel, 2020; Liu et al., 2021).

Increases in infiltration-excess overland flow are often associated with increases in flood (Ebel, 2024; Xu et al., 2023) and debris flow hazards (Nyman et al., 2011) in the first several years following fire. Increases in infiltration-excess overland flow following fire result from reductions in interception (Stoof et al., 2012) and water storage in litter and duff (Robichaud  
40 et al., 2016) as well as changes to soil hydraulic properties that reduce infiltration capacity (Ebel and Moody, 2017; Ebel, 2019). The immediate effects and temporal persistence of fire-driven changes to soil hydraulic properties have been inferred from model calibration (Cydzyk and Hogue, 2009; Liu et al., 2021) and studied using point scale measurements (Liu et al., 2023; Perkins et al., 2022) and plot scale rainfall simulation experiments (Robichaud et al., 2016). Fire effects on soil hydraulic properties and runoff are greatest immediately after fire and decay with time (Noske et al., 2016; Ebel and Martin,  
45 2017; Saxe et al., 2018), which is consistent with the conceptual model of a window of disturbance following fire (Shakesby and Doerr, 2006). Ebel and Martin (2017) represent postfire changes in saturated hydraulic conductivity using a logistic curve, though the superposition of fire effects and seasonal variations in soil hydraulic properties can lead to more complex, non-monotonic relationships between soil hydraulic properties and time since fire (Perkins et al., 2022).

50 The intensity of runoff responses in burned areas also tends to be greatest immediately following fire with subsequent decreases over time. Fire-enhanced floods and debris flows are most common in the first several years following fire (DeGraff et al 2015; Graber et al 2022; Cannon et al 2008; McGuire et al., 2024; Moody and Martin 2001). More than 70% of the largest postfire floods in the USA have occurred in the first three postfire years (Ebel 2024). Temporal changes in susceptibility to extreme responses following fire are reflected in changes to rainfall intensity-duration (ID) thresholds,  
55 which are a commonly used tool to assess debris flow and flash flood likelihood in recently burned watersheds. Rainfall ID thresholds for floods and debris flows are lowest immediately following fire and increase over time (Cannon et al., 2008; Hoch et al., 2021; Thomas et al., 2021; Liu et al., 2022). Increases in infiltration capacity and hydraulic roughness contribute to increases in rainfall ID thresholds as a function of time since fire (McGuire et al 2021; Thomas et al 2021; Liu et al, 2022). Rainfall ID thresholds based on intensities averaged over durations of 15-60 minutes have been used to assess postfire  
60 runoff (Ebel et al., 2020) and floods (Moody and Martin, 2001; Liu et al., 2022). Changes in climate are expected to alter rainfall intensity-duration-frequency curves, with the greatest increases in rainfall intensity occurring over sub-hourly durations (Martel et al., 2021). Increases in rainfall intensity over sub-hourly durations could therefore have a strong effect on postfire flow hazards (Kean and Staley, 2021; Oakley, 2021). However, the combined effects of climate change and postfire hydrologic processes on projections of future flooding and debris flows are poorly studied to date.

65

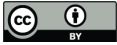

The primary objectives of this study are to (1) use observations of rainfall and runoff activity to better constrain temporal changes in effective hydrologic parameters following fire for watershed-scale flash flood simulations, and (2) use the calibrated model to quantify changes in postfire flash-flood peak discharges between present day and mid-late century due to rainfall intensification under future climate conditions. In regions like the southwestern USA, where short-duration, high-intensity rainfall events are common, severe flooding can occur with little warning. We focus, in particular, on postfire runoff driven by infiltration-excess overland flow since this is a primary driver of postfire flash flood and debris flow hazards (Schmidt et al., 2011; Ebel, 2020; Gorr et al., 2024). Our study utilizes data and observations from a 49.4 km<sup>2</sup> watershed in southern Arizona, USA that was burned by the 2020 Bighorn Fire. This work provides guidance for constraining fire effects on soil hydrologic parameters in similar environments, particularly within the southwestern USA where fire severity and area burned are increasing (Singleton et al., 2019).

## 2 Study Area

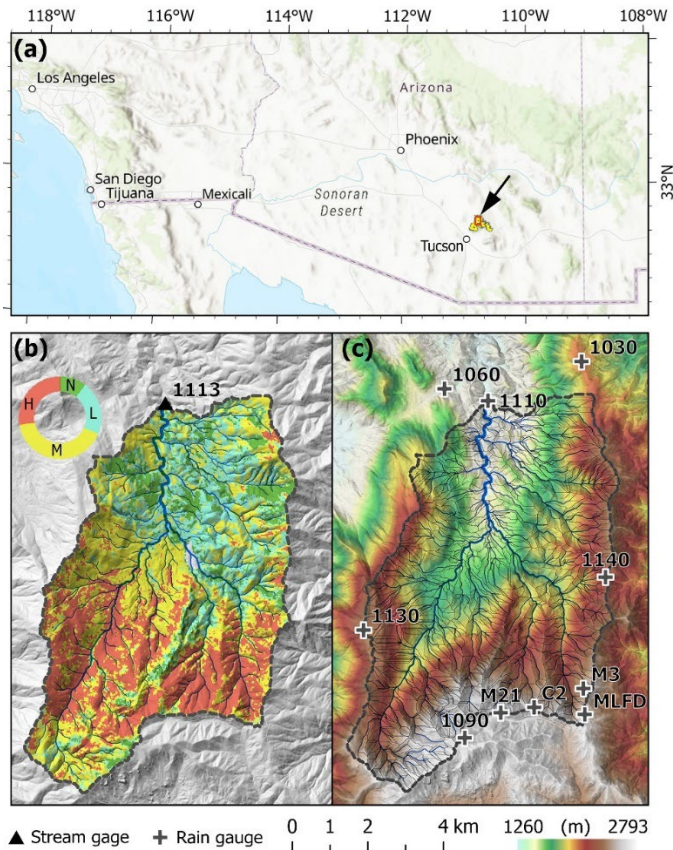

**Figure 1:** (a) The location of the upper Cañada del Oro (CDO) watershed and the 2020 Bighorn Fire perimeter near Tucson, Arizona, USA; (b) Soil burn severity for the 2020 Bighorn Fire in the CDO watershed. Soil burned severity is classified as either unburned (N), low (L), moderate (M), or high (H). The black triangle indicates the location of the stream gage (1113) installed by



the Pima County Regional Flood Control District; (c) Digital elevation model with shaded relief showing the CDO watershed with locations of ten rain gauges (black crosses). The upper CDO watershed KINEROS2 model discretization contains 1198 hillslope planes and 487 channel segments.

85 Our study focused on the upper Cañada del Oro (CDO) watershed, which drains 49.4 km<sup>2</sup> of the northern portion of the Santa Catalina Mountains to the north of Tucson, Arizona, USA (Fig. 1). The mean annual rainfall is about 640 mm with a maximum of 1186 mm and minimum of 112 mm between 1980-2024 (Abatzoglou, 2013). Approximately 44% of mean annual precipitation is delivered between June and September due to convective rainstorms associated with the North American monsoon (Adams and Comrie, 1997). According to NOAA Atlas 14 (Perica et al. 2011; 90 <https://hdsc.nws.noaa.gov/pfds/>), the estimated rainfall intensity for a 2-year storm event is approximately 77 mm hr<sup>-1</sup> over a 15-minute duration and about 19 mm hr<sup>-1</sup> over a 60-minute duration. Infiltration excess overland flow during intense monsoon rainstorms is the primary mechanism for generating postfire floods and debris flows in Arizona (Raymond et al., 2020; Gorr et al., 2023a; Gorr et al., 2023b).

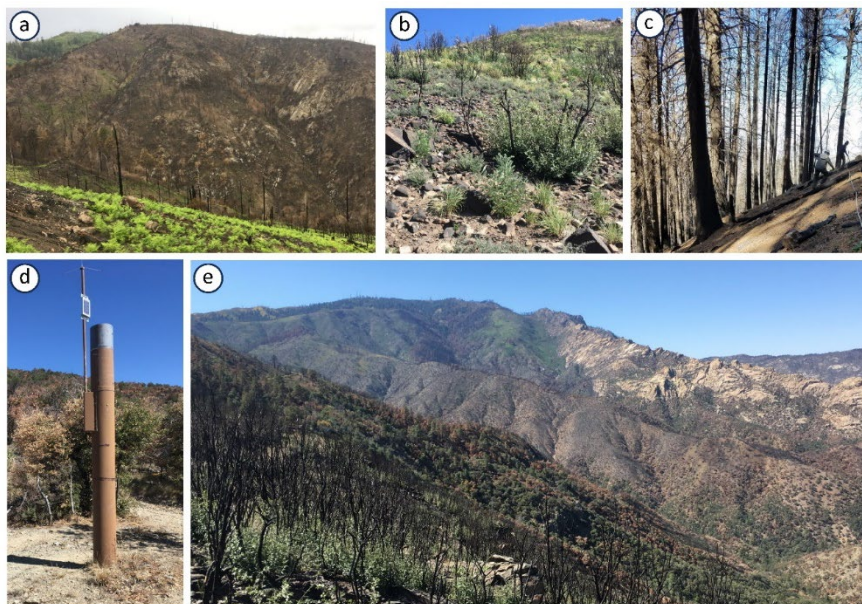

95  
100  
Figure 2. (a) Photo taken on 7 July 2020 of small tributaries at the headwaters of the CDO watershed, near the MLFD rain gauge. The area burned primarily at moderate and high severity. (b) Photo taken in October 2020 of a hillslope, which burned at moderate severity in the 2003 Aspen Fire and moderate severity in the 2020 Bighorn Fire, near the MLFD rain gauge. (c) Photo taken in October 2020 of a hillslope near the C2 rain gauge, which did not burn in the 2003 Aspen Fire and was burned at moderate severity in the 2020 Bighorn Fire. (d) The Automated Local Evaluation in Real Time (ALERT) rain gauge installed at Dan's Saddle (1140). (e) A view of the headwaters of the CDO watershed in October 2020.



The Bighorn Fire, which ignited on 5 June 2020 and was contained on July 23, burned 306.5 km<sup>2</sup> of the Santa Catalina  
105 Mountains. The type and density of vegetation in the Santa Catalina Mountains varies substantially with elevation. The fire  
burned through a range of plant communities from Sonoran Desertscrub at the lowest elevations to mixed conifer forest at  
higher elevations. Soil burn severity was mapped by the Burned Area Emergency Response team (e.g. Parson et al., 2010)  
using a combination of remote sensing data, namely the differenced normalized burn ratio (*dNBR*), and field observations.  
Approximately 10% of the area within the fire perimeter was classified as unburned or burned at very low severity, 21%  
110 burned at low severity, 41% at moderate severity, and 28% at high severity (Fig 1b). In addition to burning during the  
Bighorn Fire in 2020, the CDO watershed was also burned by the 2003 Aspen Fire (10% low severity, 15% moderate  
severity, 55% high severity).

### 3 Materials and methods

#### 3.1 Hydrologic monitoring

115 Temporal changes in soil hydrologic parameters were quantified by calibrating a model to a series of rainfall-runoff events  
that occurred in the CDO watershed at different times following the fire, as described in more detail in Section 3.2. Model  
calibration required rainfall, runoff, and soil moisture data. We utilized rainfall measurements collected by six Automated  
Local Evaluation in Real Time (ALERT) tipping bucket rain gauges maintained by the Pima County Regional Flood Control  
District (PCRFCD) (Figure 2d). Data from these gauges are available throughout the entire study period from July 2020 to  
120 September 2023. We further installed one tipping bucket rain gauge (Onset HOBO RG3-M), which we refer to as the Loma  
Linda gauge, near the headwaters of the CDO in July 2020. Data are available for this gauge from July 2020 to October 2021,  
which includes the first two monsoon seasons following the fire (Figure 1). Three additional tipping bucket rain gauges,  
which we refer to as M21, M3, and C2, were installed near the headwaters of the CDO prior to the 2021 monsoon season and  
used here to supplement data from the other gauges for the 2021 monsoon season (Figure 1). We utilize data from all  
125 available rain gauges as input for the watershed-scale hydrologic model.

Runoff hydrographs at the outlet of the CDO watershed were estimated from a pressure transducer maintained by PCRFCD.  
The pressure transducer is located approximately 0.6 meters above the channel's lowest point. Flows with peak depths below  
0.6 meters would therefore not be detected. Stage data from the pressure transducer were converted to discharge using a  
130 rating table developed by PCRFCD in 2021. Once flow is detected by the pressure transducer, data are initially logged and  
transmitted every 5 minutes. The timing of subsequent data transmissions during a rainstorm may then occur on a coarser  
temporal resolution depending on the degree to which the pressure varies over time. On average, the gauge provided  
estimates of discharge at a time interval of approximately 5 minutes during runoff events (Figure 3).

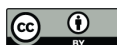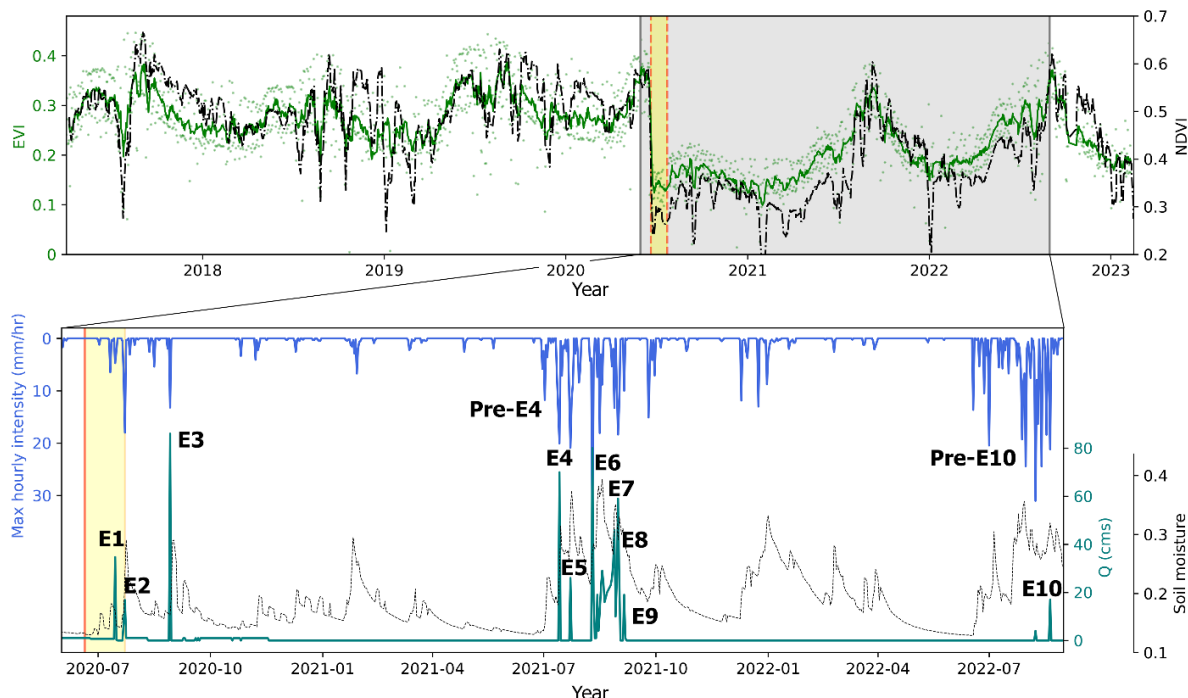

135 **Figure 3.** The 12 simulated events occurred after the ignition of the 2020 Bighorn Fire. The Enhanced Vegetation Index (EVI) and  
 140 **Normalized Difference Vegetation Index (NDVI)** data, were derived from MODIS Terra satellite imagery at a resolution of 500  
 145 **meters.** Rainfall measurements collected by six Automated Local Evaluation in Real Time (ALERT) tipping bucket rain gauges  
 maintained by the Pima County Regional Flood Control District (PCRFC), supplemented by four additional gauges we installed  
 during the study period (referenced in Figure 1). The maximum hourly rainfall intensity was estimated using these rain gauge data  
 with the Thiessen polygon method. Runoff hydrographs at the outlet of the CDO watershed were obtained from a PCRFC-  
 maintained streamflow gauge.

145 **Table 1.** A summary of simulated rainfall-runoff events after the 2020 Bighorn Fire during 2020–2023 on the upper Cañada del  
 Oro watershed.

| Event ID | Date      | Initial soil moisture | Rainfall depth (mm) | Rainfall duration (min) | Peak I15 (mm/hr) | Peak I30 (mm/hr) | Median intensity coverage* | Runoff ratio | Peak Q (m <sup>3</sup> /s) |
|----------|-----------|-----------------------|---------------------|-------------------------|------------------|------------------|----------------------------|--------------|----------------------------|
| 1        | 7/15/2020 | 0.18                  | 6.4                 | 44                      | 12.0             | 9.3              | 27%                        | 0.13         | 34.7                       |
| 2        | 7/22/2020 | 0.15                  | 7.9                 | 35                      | 23.3             | 14.9             | 25%                        | 0.03         | 7.8                        |
| 3        | 8/29/2020 | 0.16                  | 19.9                | 121                     | 22.1             | 19.0             | 80%                        | 0.12         | 86.0                       |
| Pre-4    | 6/30/2021 | 0.14                  | 15.5                | 189                     | 10.1             | 7.8              | 35%                        | 0            | 0                          |
| 4        | 7/14/2021 | 0.19                  | 28.8                | 124                     | 33.8             | 26.8             | 69%                        | 0.10         | 70.0                       |
| 5        | 7/23/2021 | 0.27                  | 39.4                | 182                     | 40.7             | 30.0             | 58%                        | 0.03         | 26.0                       |
| 6        | 8/10/2021 | 0.24                  | 47.8                | 527                     | 45.4             | 40.4             | 43%                        | 0.22         | 80.0                       |
| 7        | 8/30/2021 | 0.31                  | 30.9                | 955                     | 25.8             | 21.0             | 48%                        | 0.36         | 25.0                       |
| 8        | 8/31/2021 | 0.31                  | 75.9                | 725                     | 40.4             | 37.2             | 74%                        | 0.11         | 59.0                       |
| 9        | 9/5/2021  | 0.31                  | 16.1                | 71                      | 26.0             | 16.0             | 46%                        | 0.19         | 19.0                       |
| Pre-10   | 7/1/2022  | 0.19                  | 19.9                | 72                      | 31.2             | 26.6             | 39%                        | 0            | 0                          |
| 10       | 8/20/2022 | 0.29                  | 60.5                | 456                     | 27.3             | 23.8             | 68%                        | 0.08         | 17.0                       |

\* Median intensity coverage: the proportion of the rainfall area where the intensity exceeds the median value of the entire rainfall field.



We selected storm events for hydrologic modeling by compiling all 10 events between the beginning of the 2020 monsoon  
150 season (June 2020) and the end of the 2023 monsoon season (September 2023) that produced high-intensity rainfall and a  
measurable flow response at the outlet of the upper CDO watershed (Events 1-10 in Figure 3 and Table 1). In addition, we  
selected two storms that produced high-intensity rainfall but no measurable flow response (Pre-4 and Pre-10 in Figure 3 and  
Table 1). The daily volumetric soil moisture content (0-5 cm) for each event was obtained from Climate Forecast System  
Reanalysis (CFSR, Schneider et al., 2013).

### 155 3.2 Inferring roughness and soil hydrologic parameters

We used the KINEROS2 (K2) hydrological model to simulate rainfall partitioning, overland flow generation, and flood  
routing for individual events in the upper CDO watershed with the goal of inferring temporal changes in hydrologic  
parameters as a function of time since fire. K2 is an event-scale, distributed-parameter, process-based watershed model,  
which has been used extensively for rainfall-runoff processes in semi-arid and arid watersheds (Smith et al., 1995; Goodrich  
160 et al., 2012). Its infiltration dynamics are modeled after the Parlange et al. (1982) approach, complementing the kinematic  
wave equations that efficiently simulate overland and channel flows in steep, mountainous regions (Woolhiser et al. 1967).  
The model has been used in past studies to infer temporal changes in watershed-scale hydrologic and hydraulic parameters in  
burned watersheds (e.g., Chen et al., 2013; Liu et al., 2021).

165 K2 idealizes topography as a series of connected hillslope planes and channel segments. The upper CDO watershed was  
discretized into 1685 elements, including 1198 hillslope planes and a stream network of 487 channel segments based on a 1  
m lidar-derived digital elevation model (DEM). The simulation files needed to run K2, including these structured hillslope  
and channel segments, and default parameterizations were prepared using the Automated Geospatial Watershed Assessment  
toolkit (AGWA; Miller et al., 2007). For all portions of the model domain, we calculated the initial soil saturation (SAT)  
170 from the top 5 cm soil moisture data (CFSR), normalized by soil porosity (0.39-0.44).

We selected six parameters (Table 2) for model calibration: soil hydraulic conductivity of hillslopes ( $K_{sp}$ ) and channels  
( $K_{sc}$ ), net capillary drive of hillslopes ( $G_p$ ) and channels ( $G_c$ ), and Manning's  $n$  roughness of hillslopes ( $np$ ) and channels  
( $nc$ ). Meles et al. (2024) considered these parameters to be the most influential in the simulated rainfall-runoff behavior. The  
175 values of these parameters were calibrated in areas burned at moderate or high severity, where they were assumed to be  
spatially invariant (Fig 1b). The parameters for unburned and low SBS hillslopes and channels were initially given default  
values from the AGWA lookup tables based on soil types and land cover properties. However, preliminary event-based  
model calibrations indicated that default values for  $K_{sp}$  and  $G_p$ , which control infiltration capacity on hillslopes, were lower  
than calibrated values for areas burned at moderate to high severity in postfire years 2 and 3. As a result, using default value  
180 for  $K_{sp}$  and  $G_p$  in unburned and low severity areas would lead to simulations where runoff was being preferentially  
generated from low severity and unburned areas as opposed to areas burned at moderate to high severity, which was

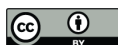

inconsistent with observations. For this reason, we set values for  $K_{sp}$  and  $G_p$  equal to values calibrated for areas burned at moderate to high severity in postfire year 3. This is consistent with the assumption that soil hydrologic parameters had approximately returned to typical unburned values by postfire year 3.

185

A total of 6000 parameter sets were generated using Progressive Latin Hypercube Sampling strategy (Sheikholeslami & Razavi, 2017). For the events with measurable streamflow (Events 1-10), we evaluated model performance for each parameter set by quantifying the match between the observed and simulated hydrographs during time periods when discharge was greater than 5% of the event peak discharge. We determined best-fit parameters for each event by maximizing the Kling-Gupta Efficiency (KGE; Gupta et al., 2009), with the top 100 KGE-ranked simulations used to estimate parameter uncertainty. For events Pre-4 and Pre-10 where there was no measurable streamflow observed, simulations that produced peak discharge rates between 0.5 m<sup>3</sup>/s and 1.5 m<sup>3</sup>/s were used to infer minimum effective values for parameters. We were able to use this approach to determine minimum values for model parameters since modeled peak discharge increases with a decrease in any of the calibrated parameters. For example, the minimum  $K_{sp}$  can be estimated based on the lowest value of  $K_{sp}$  that results in a simulated peak discharge of less than 1.5 m<sup>3</sup>/s.

190  
195

We determined estimates for model parameters as a function of time since fire based on calibration to all events where the model provided a good match to the observed runoff response, as quantified by the KGE metric. In cases where the model was not capable of reproducing the observed runoff response, as indicated by a low KGE value, we have low confidence in our ability to infer fire-driven changes in model parameters via calibration. Poor model performance, for example, could be attributed to rainfall characteristics and initial soil moisture conditions that promote saturated-excess overland flow rather than infiltration-excess overland flow, which K2 is better suited to represent. Therefore, we did not include values of model parameters inferred from events where no combination of K2 parameters resulted in a reasonable fit to the observed hydrograph.

200  
205

**Table 2. Calibrated parameters in the KINEROS (K2) model**

| Parameter name | Units                 | Feasible range | Description                                    |
|----------------|-----------------------|----------------|------------------------------------------------|
| $n_p$          | s/[m <sup>1/3</sup> ] | 0.01–0.20      | Manning’s roughness coefficient of hillslopes  |
| $K_{sp}$       | mm/hr                 | 1–70           | Saturated hydraulic conductivity of hillslopes |
| $G_p$          | mm                    | 1–70           | Effective net capillary drive of hillslopes    |
| $n_c$          | s/[m <sup>1/3</sup> ] | 0.01–0.20      | Manning’s roughness coefficient of channels    |
| $K_{sc}$       | mm/hr                 | 1–30           | Saturated hydraulic conductivity of channels   |
| $G_c$          | mm                    | 1–30           | Effective net capillary drive of channels      |

Using the same 6000 parameter sets drawn from Progressive Latin Hypercube Sampling strategy and the corresponding model outputs, we conducted a sensitivity analysis using the Variogram Analysis of Response Surfaces (VARS)





210 methodology (Razavi and Gupta, 2016a and 2016b) with a goal of ranking parameter importance. We used the KGE to  
construct a model response surface to calculate VARS-TO, a sensitivity metric which is equivalent to Sobol's variance-based  
Total-Order effect, as explained in Razavi and Gupta (2015). The relative importance for each parameter, ranging from 0 to  
1, was calculated by dividing the VARS-TO of the parameter by the sum of VARS-TOs across all parameters, offering a  
quantitative assessment of each parameter's influence on the model response (i.e. KGE).

215

### 3.3 Projected precipitation frequency estimates

Climate change is projected to increase precipitation extremes (Westra et al., 2014; Fowler et al., 2021). Sub-hourly  
precipitation rates, which significantly impact post-fire hydrogeomorphic hazards, could intensify beyond the expected 7%-  
8% per degree Celsius increase predicted by the Clausius-Clapeyron (CC) relation (Prien et al. 2017; Cannon and Innocenti  
220 2019; Fowler et al. 2021). Here, we used gridded precipitation frequency estimates to represent rainfall intensification. We  
determined reference rainfall intensity-duration frequency curves for the CDO based on historical data from NOAA Atlas 14  
(Perica et al. 2011; <https://hdsc.nws.noaa.gov/pfds/>). We then modified reference rainfall intensities,  $I_{ref}$ , based on the  
projected change in mean annual temperature,  $\Delta T$  ( $^{\circ}\text{C}$ ), at our study site according to (Martel et al., 2021),

$$I_{fut} = I_{ref} \left( \frac{100 + R_{sc}}{100} \right)^{\Delta T} \quad (1)$$

where  $I_{fut}$  is the future rainfall intensity and  $R_{sc} = 8\%/^{\circ}\text{C}$  is a CC scaling factor.

225

The change in temperature was computed using data for our study site location from Localized Constructed Analogs version  
2 (LOCA2; Pierce et al. 2023) for several future scenarios. The LOCA2 data are derived from 27 Coupled-Model  
Intercomparison Project Phase 6 (CMIP6) sets of climate model simulations covering the period between 1950 and 2100 at a  
6-km spatial resolution (Pierce et al. 2023). The future scenarios used here include mid-21<sup>st</sup> Century (2045–2074) and late-  
230 21<sup>st</sup> Century (2075–2100) for both SSP245 and SSP585 scenarios. The SSP245 scenario represents the medium pathway of  
future greenhouse gas emissions with climate protection measures being taken, while the SSP585 scenario represents the  
upper boundary of future pathways (O'Neill et al., 2016). The LOCA2 data provide monthly minimum and maximum  
temperature for each of the 27 CMIP6 models. We computed the average of monthly minimum and maximum temperature  
to calculate the mean temperature change from reference for each future period and warming scenario (Fig. S1). We then  
235 used equation 1 to calculate the 15-minute ( $I_{15}$ ) and 30-minute ( $I_{30}$ ) rainfall intensities associated with annual recurrence  
intervals (ARIs) of 1, 2, 5, and 10 years.

We used  $I_{fut}$  to construct design rainstorms to explore postfire flash flood magnitude in the CDO watershed. The duration of  
all input hyetographs is 30 minutes. The 30-min input hyetograph has the shape of a Gaussian distribution with a total



240 rainfall depth equal to  $I30/2$ . The depth of rainfall occurring in the middle 15 minutes of the design storm is equal to  $I15/4$ .  
We produced the 30-min hyetographs at the 1-, 2-, 5-, and 10-year ARI for the reference and the four future climate  
scenarios (Fig. S2-S3). To account for the uncertainty associated with the spatial scale of rainfall over the watershed and its  
influence on flood magnitude (e.g., Ebel 2024), we randomly selected continuous hillslope elements within the model  
domain to receive the designed rainstorm in thirty different configurations. The total area of the selected hillslopes accounted  
245 for 10%, 30%, 50%, 70%, and 90% of the CDO watershed, respectively. The selected areas cover the portions of the  
watershed with different soil burn severity. As such, for a given ARI rainstorm (1, 2, 5, or 10 years) and a particular climate  
scenario (1 reference and 4 future climate scenarios), we ran 450 simulations (5 rainfall extent factors, 3 postfire years, and  
30 configurations) to estimate peak discharge.

## 4 Results

### 250 4.1 Hydrological condition and model behavior

We performed 12 simulations of observed rainfall-runoff events, which exhibited distinct hydrological conditions. Events 1-  
4, pre-4, and pre-10 commenced with relatively dry soil conditions, characterized by saturation levels below 0.43  
(volumetric soil moisture divided by porosity). Conversely, the remaining five events initiated from a comparatively wet  
state, with saturation between 0.55-0.84 (Figure 4d). Furthermore, the rainfall durations varied substantially between these  
255 two groups of events. Events 1-5, pre-4, and pre-10 were relatively short-lived, lasting less than 2 hours. In contrast, the  
other five events were characterized by longer durations, between 7.6-15.9 hours (Figure 4d). These disparities in  
hydrological conditions suggest that the dominant mechanisms governing overland flow generation might differ between the  
two groups of events.

260 The hydrological model, driven by observed rainfall data, demonstrated an adequate representation of rainfall-runoff  
processes in the CDO watershed for events 1-5 (Figure 4; Figure 5). Among the top 100 simulations ranked by the KGE  
metric, the median KGE values for these five events ranged between 0.34 and 0.72, while the highest KGE values spanned  
from 0.63 to 0.82. The simulated hydrographs effectively captured the peak discharge, timing, and runoff volume of the  
observed events (Figure 5). In contrast, the model's performance for events 6-10 was relatively poor. The highest KGE  
265 values among the top 100 simulations for these events ranged from 0.07 to 0.35, while the median KGE values were  
considerably lower, ranging from 0.04 to 0.31.

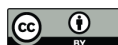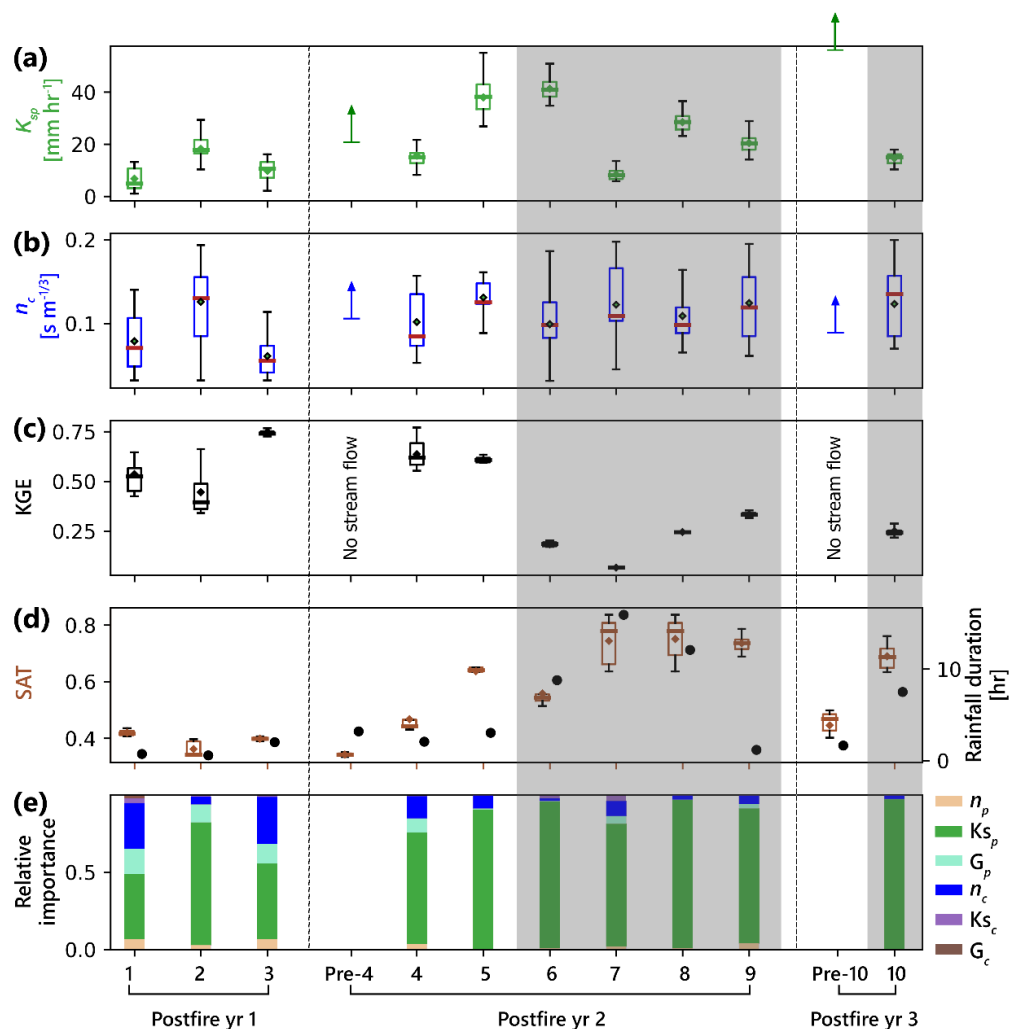

270 **Figure 4.** Summary of calibrated hydrological parameters ( $K_{sp}$ ,  $n_c$ ), model performance (KGE), volumetric soil moisture divided by porosity (SAT), rainfall duration, and relative parameter importance for the simulated 12 events. Note the shaded simulations for event 6-9 and event 10 indicate that they are excluded from analyses to constrain changes in fire-affected model parameters as a function of time since fire due to poor model performance.

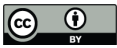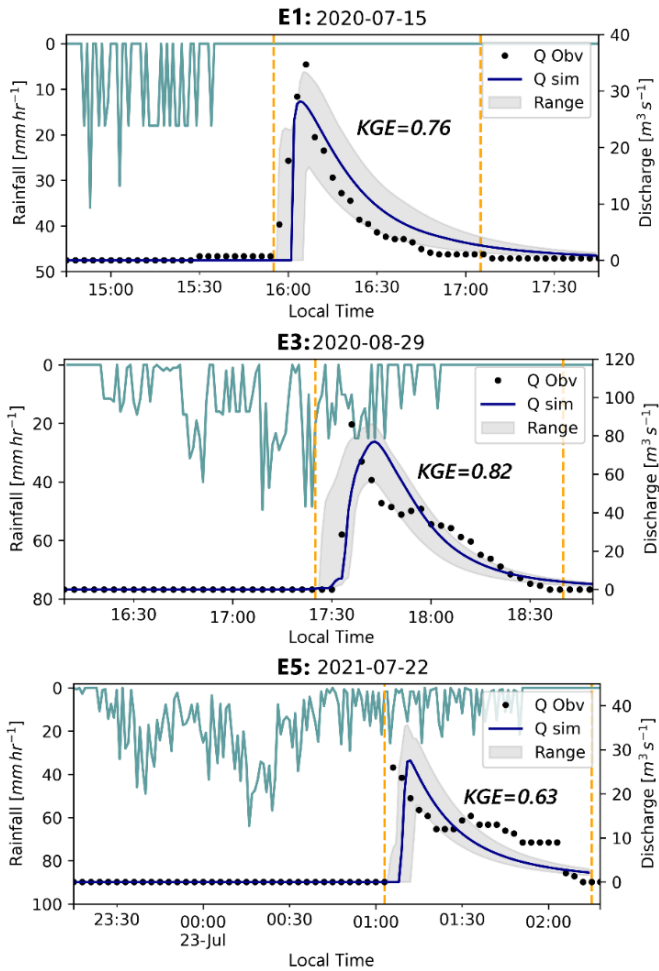

275 **Figure 5.** The simulated hydrograph associated with the largest KGE (dark blue line) and the top 100 KGE-ranked simulations (gray area) overlaid on the observed rainfall (green lines) and discharge (black dots) for events 1, 3 and 5. Boundaries of the evaluation periods (i.e. data used to compute KGE) are indicated by the dashed orange lines.

The sensitivity analysis showed that  $K_{sp}$  was the most influential parameter across all ten events when evaluating model  
280 performance using KGE (Figure 4e). For events 6, and 8-10,  $K_{sp}$  was a particularly dominant factor governing rainfall-runoff  
processes, exhibiting a relative importance of 0.87-0.96 (Figure 4e). In the case of events 1, and 3-5, the second most  
important parameter was  $n_c$ , closely followed by  $G_p$  (Figure 4e). The remaining parameters, such as  $n_p$  (Manning's roughness  
on hillslopes),  $G_c$ , and  $K_{sc}$ , exhibited negligible influence on model performance.



## 4.2 Changes in model parameters after fire

285 Since the model reproduced the observed runoff response (or lack thereof) reasonably well during events 1-5, pre-4, and pre-10, we utilize the calibrated model parameters from those events to quantify fire-affected model parameter values at different times since fire. To represent the effective hydrologic condition for the first postfire year, we used the average of the calibrated parameter values associated with the largest KGE from events 1-3. Similarly, the parameter sets associated with the best fits to events pre-4 and 4-5 were used to determine representative parameter values for the second postfire year, while event pre-10 was used to determine minimum values for representative parameters during the third postfire year. There is a substantial increase in  $K_{sp}$  from a minimum value of approximately 11 mm/hr in the first postfire year to 29 mm/hr and 60 mm/hr in postfire years two and three, respectively (Figure 4a-b; Table 3). Over the 3-year study period,  $K_{sp}$  exhibited a rate of change of 24.0 mm/hr/year ( $R^2 = 0.76$ ), as determined by a linear regression analysis. Effective net capillary drive of hillslope planes ( $G_p$ ) also presented an increasing trend with time since fire despite its more minor influence on simulated runoff relative to  $K_{sp}$  (Table 3; Figure 4e). In contrast, the Manning's roughness coefficient of the channels,  $n_c$ , remained relatively constant over time (Figure 4b). The representative value for  $n_c$  fluctuated between 0.085 s/m<sup>1/3</sup> and 0.105 s/m<sup>1/3</sup> over the first three postfire years.

**Table 3. Summary of model parameters for post-fire years 1, 2, and 3.**

| Postfire year | Calibrated events | $K_{sp}$ [mm/hr] | $n_c$ [s/m <sup>1/3</sup> ] | $G_p$ [mm] |
|---------------|-------------------|------------------|-----------------------------|------------|
| 1             | 1-3               | 11               | 0.085                       | 19         |
| 2             | Pre-4 and 4-5     | 29               | 0.105                       | 23         |
| 3             | Pre-10            | 60               | 0.090                       | 30         |

## 300 4.3 Increasing flood magnitude in a warming future

On average,  $I15$  associated with a given ARI increased relative to reference values by factors of 1.16, 1.23, 1.22, and 1.44 for scenarios SSP245 mid-21<sup>st</sup> century, SSP245 late-21<sup>st</sup> century, SSP585 mid-21<sup>st</sup> century, and SSP585 late-21<sup>st</sup> (Figure S2; Figure S3). We compared the peak discharge rates produced by rainstorms of varying ARIs covering half of the watershed in the first three postfire years under reference (1950-2014) and projected future climate scenarios (SSP245 and SSP585 for 2045-2074 and 2075-2100). Since we are interested primarily in relative changes, we normalized the peak discharge by dividing it by the mean peak discharge obtained from thirty simulations for postfire year 1 under the reference scenario. These simulations were designed to encapsulate uncertainties associated with the spatial distribution of rainfall events. Extreme discharge events become more pronounced with higher emissions pathways and greater ARIs in the CDO watershed (Figure 7). For example, the maximum peak flow under the SSP585 late 21<sup>st</sup> century is 4.7 times the reference level for an ARI of 1-yr. The ratio of the peak discharge associated with a 5-yr ARI rainstorm in postfire year one under the SSP585 late 21<sup>st</sup> century scenario is 10.4 times greater than that associated with the 1-yr ARI rainstorm under the reference scenario. Simulated peak discharge decreases with time since fire (Figure 7).



For an ARI of 1-yr in the postfire year 1, the average peak flows under the scenarios of SSP245 mid-21<sup>st</sup> century, SSP245 late-21<sup>st</sup> century, SSP585 mid-21<sup>st</sup> century, and SSP585 late-21<sup>st</sup> century were amplified by factors of 2.1, 2.4, 2.5, and 3.6, respectively, compared with the reference peak flow. The ratios of the average peak flows in postfire year 2 to the reference peak flow in postfire year 1 are 0.5, 0.7, 0.8, and 1.5 under scenarios SSP245 mid-21<sup>st</sup> century, SSP245 late-21<sup>st</sup> century, SSP585 mid-21<sup>st</sup> century, and SSP585 late-21<sup>st</sup>, respectively. For an ARI of 2-yr, the ratios of the average peak flows under the four future scenarios in postfire year 2 to that of reference level in postfire year 1 are 0.7, 0.9, 0.9, and 1.5. For an ARI of 5-yr, the ratios are 0.9, 1.0, 1.1, and 1.6 (Figure 7). The ratios of peak flows between postfire year 3 and the postfire year 1 reference level are all less than one regardless of the rainstorm's ARI. In summary, peaks flows increase in magnitude as future greenhouse gas emissions move from the medium pathway to a high pathway. They also increase from mid- to late-century regardless of the greenhouse gas emissions scenario.

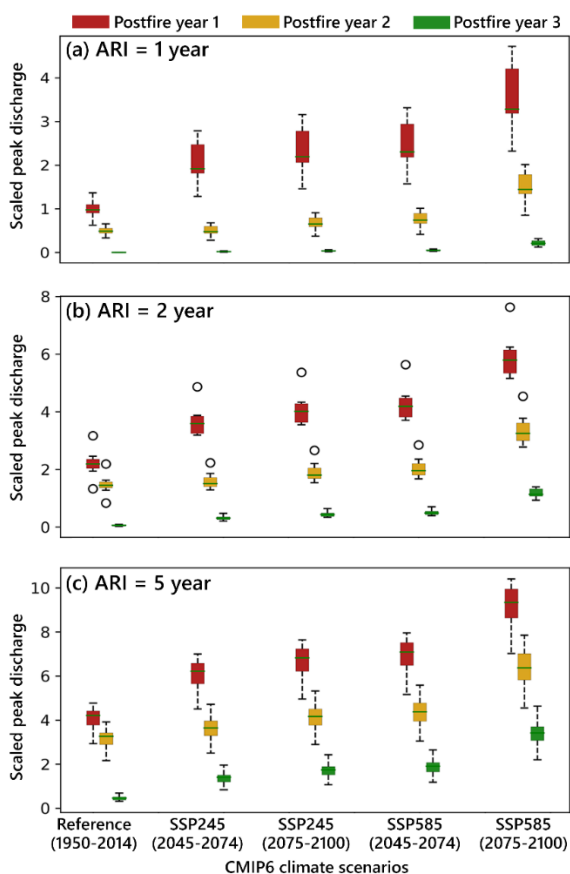

325

**Figure 7. The boxplots of the scaled peak discharge rates derived from thirty rainstorms over 50% of the watershed at the 1-, 2-, and 5-year average recurrence intervals (ARI) in postfire years 1-3 for the reference and future scenarios at the CDO watershed. The peak discharges were scaled by the mean peak discharge from thirty simulations for runoff in response to a 1-yr ARI**



330 **rainstorm in postfire year 1 for the reference scenario. Thirty rainstorms were produced to account for the uncertainty in the location and spatial extent of rainfall over the CDO watershed.**

The variability in peak flows increases with ARI as well as with the change from SSP245 to SSP585. Under the reference scenario, the normalized peak flow varies from 0.6-1.4 for a 1-yr ARI, from 1.3-3.2 for a 2-yr ARI, and from 2.9-4.8 for a 5-yr ARI in the first postfire year (Figure 7). For rainstorms at 1-yr ARI in the postfire year 1, the range of the normalized peak flows increased from 0.6-1.4 in the reference period to 1.3-2.8 in the mid-century SSP245 scenario. It then broadened to 1.5-3.3 under both the late-century SSP245 and the mid-century SSP585 scenarios, eventually reaching 2.3-4.7 under the late-century SSP585 scenario. This suggests that extreme flash floods become more common and more severe in the future high pathway of emissions (Figure 8).

340

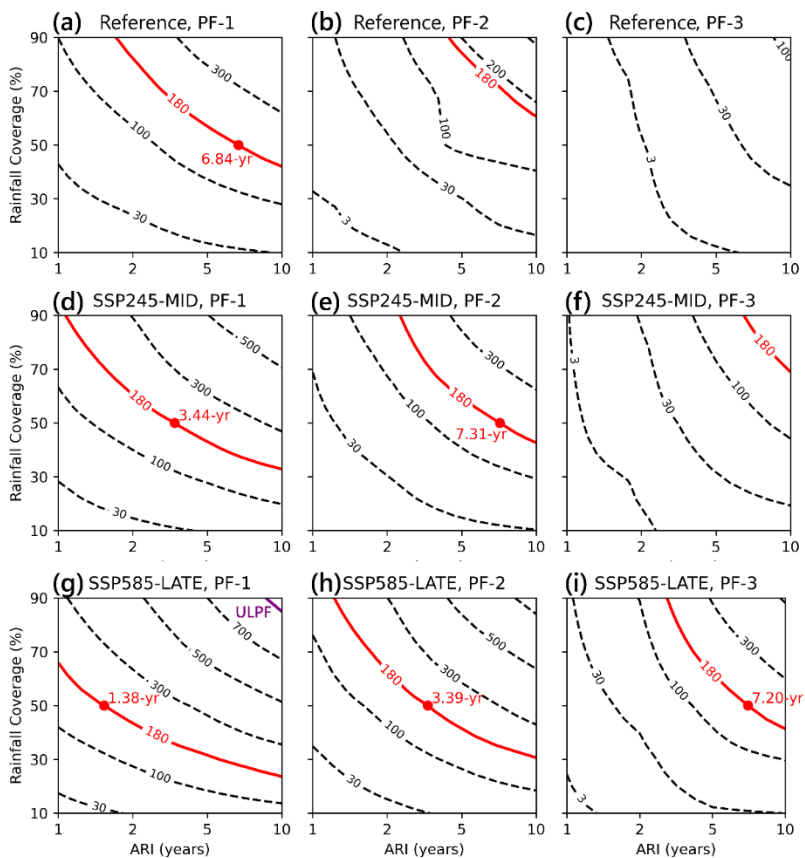

345 **Figure 8. Contours of peak discharge ( $\text{m}^3/\text{s}$ ) of simulated floods produced by design storms of varying average recurrence intervals (ARI) and rainfall coverages (from 10% to 90%) during the first three postfire (PF) years for reference and future scenarios at the CDO watershed. The thick red contours represent the 100-year flood ( $180 \text{ m}^3/\text{s}$ ), as derived from StreamStats (<https://www.usgs.gov/streamstats>; Paretti et al., 2014). Red dots indicate the ARIs of the storms that can produce a 100-year flood**



event when the spatial extent of rainfall is equal to half of the watershed area. Note the upper limit (909 m<sup>3</sup>/s) for postfire flood discharge (ULPF; Ebel, 2024) can only be produced by rainstorms with an ARI exceeding 8-years that cover more than 82% of the watershed under the late 21<sup>st</sup> century SSP585 scenario.

350 We present contours delineating peak discharge (m<sup>3</sup>/s) associated with rainstorms that cover 10%, 30%, 50%, 70% and 90%  
of the CDO watershed for 1-, 2-, and 5-year ARIs over the initial three postfire years in the reference and the two projected  
future scenarios at the CDO watershed (Figure 8). Peak discharge increases with ARI, more extreme emissions pathways,  
and the extent of rainfall coverage within the watershed. In postfire year 1 under the reference climate scenario, a rainstorm  
with a roughly 7-yr ARI that covers 50% of the watershed would be needed to generate the discharge associated with the  
355 100-yr flood (180 m<sup>3</sup>/s), as derived from StreamStats (<https://www.usgs.gov/streamstats>; Paretti et al., 2014). Under the  
SSP245 mid-century scenario, the same rainstorm characterized by an ARI of roughly 7 years with 50% coverage across the  
watershed would produce a peak discharge equivalent to the 100-yr flood even if it occurred during postfire year 2.  
Similarly, this same rainstorm would produce a discharge equivalent to that of the 100-yr flood during postfire year 3 under  
the SSP585 late-century scenario. Simulations therefore demonstrate an increased persistence of postfire flood hazards under  
360 future climate scenarios due to rainfall intensification.

Additionally, a rainstorm with 50% coverage across the watershed can produce a peak discharge equivalent to that of the  
100-year flood with an ARI as short as 1.4 years in the SSP585 late-century scenario. The upper limit of peak discharge for a  
postfire flood (ULPF) in the CDO (909 m<sup>3</sup>/s), based on watershed area (Ebel, 2024), can be produced by rainstorms that  
365 have an ARI of approximately 10 years and a rainfall coverage percentage close to 90% in the first postfire year under the  
SSP585 late century scenario (Figure 8g). No simulated rainstorms were capable of producing discharges that approached  
the ULPF (909 m<sup>3</sup>/s) under the reference or SSP245 scenarios.

## 5 Discussion

### 5.1 Event selection and runoff generation mechanism

370 This study uses K2 model calibration to examine the temporal change in watershed-scale hydrologic model parameters  
following a fire. This methodology, which has been utilized in similar hydrological studies within burned watersheds (Chen  
et al., 2013; Liu et al., 2021), provides insights into postfire hydrological dynamics and watershed recovery. In past work  
using the K2 model to infer temporal changes in hydrologic parameters following fire (Liu et al., 2021), rainfall-runoff  
events were preferentially selected based on whether or not they exhibited characteristics consistent with infiltration-excess  
375 runoff, which aligns well with the K2 model's strength in capturing the dynamics of infiltration-excess overland flow using  
the Parlange et al. (1982) approximation. However, the model's effectiveness in simulating baseflow and subsurface flow is  
limited, leading to potential inaccuracies in representing watershed conditions when runoff is not primarily infiltration-





excess dominated. Therefore, K2 model performance is likely to decrease when simulating events dominated by saturation excess overland flow. Further, inferred variations in model parameters from one event to another may be driven by a need to  
380 compensate, to varying degrees, for saturated-excess runoff generation processes not represented by the model rather than reflecting changes in fire effects.

Among the 12 simulated events in this study, five (events 6-10) exhibit initial soil saturation (SAT, defined as soil moisture divided by porosity) equal to or greater than 0.55, or rainfall durations exceeding 7.6 hours. Under these conditions,  
385 infiltration-excess overland flow is less likely to be the dominant runoff-generated mechanism. The model performance of these events is, as expected, relatively poor compared with other events (Figure 4). We therefore excluded events 6-10 from our efforts to use K2 to quantify changes in soil hydrologic and hydraulic roughness parameters as a function of time since fire. The apparent shift from flood generation due primarily to infiltration-excess to saturation-excess overland flow, or a mix of the two mechanisms, in less than two years following fire is consistent with the relatively rapid increase in soil  
390 infiltration capacity inferred from model calibration of events 1-5 (Figure 4; Table 3).

Postfire floods can stem from various overland flow generation mechanisms, including saturation-excess overland flow, subsurface storm flow, or combinations thereof (Ebel et al., 2012; Ebel, 2024). Runoff events excluded in this study, specifically events 6-10, are more likely to arise from a mixture of these runoff-generation mechanisms. Utilizing a  
395 hydrological model capable of capturing both surface and subsurface flow dynamics, such as ParFlow (e.g., Atchley et al., 2018), holds the potential to enhance data interpretation through continuous simulation, thereby allowing for the inference of temporal changes in watershed hydrological properties. This comprehensive approach could enable simulation of the full spectrum of streamflow generation mechanisms, offering more general insights into the full range of flood generation processes prevalent to wildfire-prone, mountainous regions like the western United States. Such modeling efforts not only  
400 facilitate the understanding of large postfire floods under the assumption of infiltration-excess mechanisms but also provide crucial information for predicting baseflow and ecological flow. These insights could be informative for effective water resources management in burned watersheds.

## 5.2 Postfire trajectories of model parameters

Infiltration tends to decrease immediately after moderate and high severity fire (e.g., Ebel and Martin, 2017; Ebel, 2019), but  
405 there is substantial site-to-site variability (McGuire et al., 2024). In some cases, saturated hydraulic conductivity may increase or remain unchanged following fire (e.g., Rodríguez-Alleres et al., 2013; Raymond et al., 2020; McGuire et al., 2024). We infer the lowest values of  $K_{sp}$  from the first event immediately following the Bighorn Fire (Fig 4a). Subsequently, we observe an increase in  $K_{sp}$  over time, with an average over three events of 11 mm/hr in the first postfire year, 29 mm/hr in the second postfire year, and greater than 60 mm/hr in postfire year three (Table 3). This increase, averaging 24 mm/hr per  
410 year, represents a more pronounced trend compared to other studies in the southwest US, such as those examining the



Buzzard Fire in eastern New Mexico and the Fish Fire in the San Gabriel Mountains in southern California (Hoch et al., 2021; McGuire et al., 2021). For instance, Hoch et al. (2021) highlights a comparable increase in saturated hydraulic conductivity following a moderate-high severity fire in a forested area of New Mexico, USA, albeit at a more modest rate. Based on measurements with a tension infiltrometer, field-saturated hydraulic conductivity increased from 19 mm/h to 28  
415 mm/h from postfire year one to postfire year three following a moderate severity fire in the San Gabriel Mountains of southern California (McGuire et al., 2021). Liu et al. (2021) used the same approach applied here based on watershed-scale model calibration to infer an increase in  $K_{sp}$  from roughly 7 mm/h to 24 mm/h over a four year time period following a moderate-high severity fire in the Arroyo Seco watershed in the San Gabriel Mountains. Variations in the magnitude of fire-driven reductions to  $K_{sp}$  and subsequent rate of change in  $K_{sp}$  with time since fire could result from either different  
420 physiographic features of these sites, such as soil and dominant vegetation types, or the different methods used to constrain  $K_{sp}$  (Ebel et al., 2019).

Similarly, the trend of increasing net capillary drive ( $G_p$ ) inferred from our model calibrations is generally consistent with other studies in the southwest US that have documented relatively low values in  $G_p$  immediately after fire followed by  
425 subsequent increases over time (McGuire et al., 2021; Hoch et al., 2021). A synthesis study of soil hydraulic parameters in fire-affected soils found that sorptivity and wetting front potential were significantly lower in burned soils compared to unburned soils (Ebel and Moody, 2017). Liu et al. (2021), however, found no relationship between  $G_p$  and time since fire in their study of the Arroyo Seco watershed in southern CA. The lack of a trend in  $G_p$  as a function of time since fire (e.g., Liu et al, 2021) may be at least partially attributed to the more minor role that  $G_p$  appears to play in watershed-scale runoff  
430 responses based on relative importance of this parameter in the events modeled in this study (Figure 4).

In contrast to several past studies in the southwest US, which have generally found that hydraulic roughness is lowest immediately following fire and then increases with time (Canfield et al., 2005; Liu et al., 2021), we found that hydraulic roughness was relatively constant with time since fire. Liu et al. (2021) inferred an increase in  $n_c$  from roughly 0.09 to 0.3  
435 over a time period of roughly two years after a fire in the San Gabriel Mountains, CA. Postfire dry ravel is common in the San Gabriel Mountains and can load channels with substantial amounts of relatively fine hillslope sediment, decreasing grain roughness in channels immediately after fire. We did not observe any evidence of widespread dry ravel in the CDO following the Bighorn Fire, which could account for the more muted change in  $n_c$  as a function of time since fire compared to that found by Liu et al. (2021). Increases in hydraulic roughness as a function of time since fire could also result more  
440 generally from preferential transport of fine sediment and the exposure of cobbles and boulders (Rengers et al., 2016), regardless of whether postfire dry ravel is an active process. We hypothesize that such a trend may also have been less pronounced at our site due preferential transport of fines following the fire in 2003.



Our findings support those of previous studies that have documented fire-induced reductions in soil infiltration capacity (e.g. 445 due to reductions in  $K_{sp}$  and  $G_p$ ). Our findings provide more detailed information, however, for the expected magnitude of fire-driven changes in common hydrologic model parameters and the rates at which they change as a function of time since fire. These results therefore provide guidance for using hydrologic models to simulate postfire runoff and hydrologic hazards at the watershed scale in similar settings. We hypothesize that the postfire trajectories of the hydrologic model parameters inferred here depend on canopy and ground cover dynamics, soil water repellency, burn severity, and postfire hydroclimate 450 conditions, including drought (Larson-Nash et al., 2018). Further investigation is warranted to unravel the intricate mechanisms underlying these phenomena across different geographical regions and how they relate to changes in hydrologic model parameters.

In this study, the observation of the lowest levels of infiltration capacity immediately after the fire suggests a heightened 455 probability and severity of postfire flood and debris flow hazards during the first postfire rainy season. Consequently, it is crucial to closely monitor and assess the potential risks to downstream areas during this period. For instance, the first runoff event following the Bighorn Fire was produced by a rainstorm with a peak  $I15$  of 12 mm/h and a duration of 44 minutes. It led to a flood with a peak discharge of 35 m<sup>3</sup>/s (equivalent to a 5-year return period) at the outlet of the CDO watershed. In contrast, there was no measurable flow during event pre-10, which occurred in the third postfire year and had peak  $I15$  of 31 460 mm/h and a duration of 71 minutes. This difference in response between the first and third rainy season following the fire underscores the significant impact of immediate postfire conditions on flood severity.

In this study, the persistence of fire-driven reductions to infiltration capacity could continue to promote increases in hydrologic hazards throughout the first 1-2 years after fire. Understanding these dynamics is essential for implementing 465 effective mitigation strategies and informing land management decisions in fire-prone areas, especially in the context of a warming future with anticipated increases in short-duration, high-intensity rainfall (e.g., Martel et al., 2021; Westra et al., 2014; Fowler et al., 2021).

### 5.3 Effects of rainfall intensification

The likelihood and magnitude of floods and debris flows can be substantially influenced by reductions in soil infiltration 470 capacity and hydraulic roughness caused by fires (Liu et al., 2022). These effects are expected to be exacerbated by the intensification of rainfall due to future warming. Amplification of postfire flow hazards may manifest as an increase in flow magnitude and/or a higher probability of occurrence. In this study, under the four future warming scenarios, peak flow rates are projected to be 2.1-3.6 times greater than the reference levels given a specific ARI of rainfall in the first year following the fire (Figure 7). The increase in peak flow response can be driven by increased spatial rainfall coverage as well as 475 warming-induced rainfall intensification due to greenhouse gas emissions (Figure 8). Currently, a 100-year flood necessitates approximately a 7-year rainstorm covering 50% of the CDO watershed in the first postfire year. However, under the SSP245



480 scenario, a similar flood could be triggered by a 3.4-year rainstorm by mid-century, effectively doubling the likelihood of a  
100-year flood under a medium pathway of greenhouse gas emissions with climate protection measures. In the scenario with  
the highest greenhouse gas emissions, such floods could become even more frequent, occurring with a 1.4-year rainstorm by  
the end of the century (Figure 8g). The maximum postfire flood, as defined by the postfire flood envelope curve under  
current climate conditions (Ebel, 2024), could be triggered by a 10-year rainstorm covering most of the watershed by late  
century under the highest greenhouse gas emissions scenario (SSP585). Warming-related rainfall intensification is similarly  
expected to increase the frequency of significant postfire debris flows, such as those experienced in Montecito, California, in  
2018 (Kean & Stanley, 2021).

485

Another critical aspect is the duration of flow amplification following a fire across various future warming scenarios. To  
answer this question, it at least requires understanding and quantifying 1) the temporal changes in runoff production within  
burned watersheds, 2) the magnitude of warming-related rainfall intensification, and 3) an effective tool, such as a  
hydrological model, to integrate the effects of the watershed's fire-altered function and intensified rainfall. We assessed the  
trajectory of watershed scale soil infiltration capacity and channel roughness following a fire, as discussed in Section 5.2.  
We used a method adapted from Martel et al (2021), which is widely used in other studies and governmental practices  
worldwide (e.g., Bao et al., 2017; Cannon & Innocenti, 2019), to represent rainfall intensification across various future  
warming scenarios based on CMIP6-derived LOCA2 data. We calibrated a K2 hydrological model, recognized for its  
efficacy in semi-arid and arid watershed rainfall-runoff processes (Smith et al., 1995; Goodrich et al., 2012), to estimate the  
runoff response to intensified rainfall in each postfire year in the studied watershed.

495

Our findings indicate that amplified peak flows with magnitudes currently expected only in the first postfire year could be  
met or exceeded even in the second postfire year under future climate scenarios due to rainfall intensification (Figure 7;  
Figure 8). This conclusion is based on a rainfall coverage of 50% across the studied watershed, or nearly 25 km<sup>2</sup>. We chose  
this specific coverage because the area enclosed by isohyets for intense, convective rainfall in the southwestern United States  
shows a scale change near 25 km<sup>2</sup> (Osborn & Reynolds, 1963; Osborn et al., 1979), akin to the average storm size  
enclosed by median rainfall intensity isohyets for all 12 events occurring in the three years postfire (Table 1). Storm size  
could also be affected by a warming future (Bao et al., 2024), which suggests avenues for further investigation. Furthermore,  
our simulations indicate that floods in the first two postfire years are predominantly characterized by infiltration-excess  
overland flow, occurring when rainfall rates surpass effective soil infiltration capacity.

505

## 6 Conclusions

In this study, we used the K2 hydrologic model to simulate infiltration excess overland flow at the watershed scale (49.4  
km<sup>2</sup>) in response to several rainstorms during the first three years following the 2020 Bighorn Fire in the Santa Catalina



Mountains in southern Arizona, USA. Results indicate soil saturated hydraulic conductivity ( $K_{sp}$ ) and net capillary drive ( $G_p$ ) are lowest immediately following fire and increase with time since fire, while channel roughness ( $n_c$ ) remains relatively constant. Based on this postfire trajectory, we estimated peak flows in response to design rainstorms derived from historic data and intensified rainstorms under four future climate scenarios, namely SSP245 and SSP585 both at mid- and late-century. We found that the likelihood of a 100-yr flood will double by mid-century in the studied watershed under the medium emissions path (SSP245). Postfire flood maxima under the historical climate condition will be triggered by a 10-yr rainstorm covering most of the watershed under the high emissions pathway (SSP585) by the late century. The amplification of peak flows is expected to persist during the first two postfire years under both the medium emissions pathway by late century and the high emissions pathway from mid-century onwards. These results improve understanding of postfire watershed hydrologic dynamics and provide information for assessing postfire hydrologic hazards, which can inform mitigation strategies and adaptive planning to address the challenges posed by increasing fire activity and rainfall intensification.

#### Code/Data availability

The KINEROS2 model simulation data used for analysis and visualization are available for research purposes at <https://doi.org/10.5281/zenodo.12803607>.

#### Competing Interests

The authors have no relevant financial or non-financial interests to disclose.

#### Author Contributions

Conceptualization: Tao Liu, Luke A. McGuire, Ann M. Youberg

Data curation: Tao Liu, Luke A. McGuire, Ann M. Youberg

Formal analysis: Tao Liu, Luke A. McGuire

Funding acquisition: Luke A. McGuire, Ann M. Youberg, Charles J. Abolt

Investigation: Tao Liu, Luke A. McGuire, Ann M. Youberg, Charles J. Abolt

Methodology: Tao Liu, Luke A. McGuire

Supervision: Luke A. McGuire, Ann, M. Youberg

Validation: Tao Liu, Charles J. Abolt, Adam L. Atchley

Visualization: Tao Liu

Writing – original draft: Tao Liu



Writing – review & editing: Tao Liu, Luke A. McGuire, Ann M. Youberg, Charles J. Abolt, Adam L. Atchley

## Acknowledgements

This material is based upon work supported by the U.S. Geological Survey under Grant/Cooperative Agreement No. G23AC00447-00, the Pima County Regional Flood Control District under Grant Agreement No. RFCD-2020-003, and the Laboratory Directed Research and Development program of Los Alamos National Laboratory under project number 20240448ER. We thank Lynn Orchard and Alireza Arabzadeh from the Pima County Regional Flood Control District for their assistance with rainfall and runoff data.

## References

- Abatzoglou, J. T. (2011). Development of gridded surface meteorological data for ecological applications and modelling. *International Journal of Climatology*, 33(1), 121–131. <https://doi.org/10.1002/joc.3413>
- Atchley, A. L., Kinoshita, A. M., Lopez, S., Trader, L., & Middleton, R. H. (2018). Simulating Surface and Subsurface Water Balance Changes Due to Burn Severity. *Vadose Zone Journal*, 17(1), 1–13. <https://doi.org/10.2136/vzj2018.05.0099>
- Bao, J., Sherwood, S. C., Alexander, L. V., & Evans, J. P. (2017). Future increases in extreme precipitation exceed observed scaling rates. *Nature Climate Change*, 7(2), 128–132. <https://doi.org/10.1038/nclimate3201>
- Bao, J., Stevens, B., Lukas Kluft, & Muller, C. (2024). Intensification of daily tropical precipitation extremes from more organized convection. *Science Advances*, 10(8). <https://doi.org/10.1126/sciadv.adj6801>
- Boer, M. M., Bowman, D. M. J. S., Murphy, B. P., Cary, G. J., Cochrane, M. A., Fensham, R. J., Krawchuk, M. A., Price, O. F., De Dios, V. R., Williams, R. J., & Bradstock, R. A. (2016). Future changes in climatic water balance determine potential for transformational shifts in Australian fire regimes. *Environmental Research Letters*, 11(6), 065002. <https://doi.org/10.1088/1748-9326/11/6/065002>
- Canadell, J. G., Meyer, C. P. (Mick), Cook, G. D., Dowdy, A., Briggs, P. R., Knauer, J., Pepler, A., & Haverd, V. (2021). Multi-decadal increase of forest burned area in australia is linked to climate change. *Nature Communications*, 12(1). <https://doi.org/10.1038/s41467-021-27225-4>
- Canfield, H. E., Goodrich, D. C., & Burns, I. S. (2005). Selection of Parameters Values to Model Post-Fire Runoff and Sediment Transport at the Watershed Scale in Southwestern Forests. *Managing Watersheds for Human and Natural Impacts*. [https://doi.org/10.1061/40763\(178\)48](https://doi.org/10.1061/40763(178)48)
- Cannon, A. J., & Innocenti, S. (2019). Projected intensification of sub-daily and daily rainfall extremes in convection-permitting climate model simulations over North America: implications for future intensity–duration–frequency curves. *Natural Hazards and Earth System Sciences*, 19(2), 421–440. <https://doi.org/10.5194/nhess-19-421-2019>



- Cannon, S. H., Gartner, J. E., Wilson, R. C., Bowers, J. C., & Laber, J. L. (2008). Storm rainfall conditions for floods and debris flows from recently burned areas in southwestern Colorado and southern California. *Geomorphology*, 96(3-4), 250–269. <https://doi.org/10.1016/j.geomorph.2007.03.019>
- 570 Chen, L., Berli, M., & Chief, K. (2013). Examining Modeling Approaches for the Rainfall-Runoff Process in Wildfire-Affected Watersheds: Using San Dimas Experimental Forest. *Journal of the American Water Resources Association*, 49(4), 851–866. <https://doi.org/10.1111/jawr.12043>
- Cydzik, K., & Hogue, T. S. (2009). Modeling Postfire Response and Recovery using the Hydrologic Engineering Center Hydrologic Modeling System (HEC-HMS). *JAWRA Journal of the American Water Resources Association*, 45(3),  
575 702–714. <https://doi.org/10.1111/j.1752-1688.2009.00317.x>
- Ebel, B. A. (2019). Measurement Method Has a Larger Impact Than Spatial Scale For Plot-Scale Field-Saturated Hydraulic Conductivity (Kfs) After Wildfire and Prescribed Fire in Forests. *Earth Surface Processes and Landforms*, 44(10), 1945–1956. <https://doi.org/10.1002/esp.4621>
- Ebel, B. A. (2020). Temporal evolution of measured and simulated infiltration following wildfire in the Colorado Front  
580 Range, USA: Shifting thresholds of runoff generation and hydrologic hazards. *Journal of Hydrology*, 585, 124765. <https://doi.org/10.1016/j.jhydrol.2020.124765>
- Ebel, B. A. (2024). Upper limits for post-wildfire floods and distinction from debris flows. *Science Advances*, 10(8). <https://doi.org/10.1126/sciadv.adk5713>
- Ebel, B. A., & Moody, J. A. (2017). Synthesis of soil-hydraulic properties and infiltration timescales in wildfire-affected  
585 soils. *Hydrological Processes*, 31(2), 324–340. <https://doi.org/10.1002/hyp.10998>
- Ebel, B. A., Moody, J. A., & Martin, D. A. (2012). Hydrologic conditions controlling runoff generation immediately after wildfire. *Water Resources Research*, 48(3). <https://doi.org/10.1029/2011wr011470>
- Esposito, G., Gariano, S. L., Masi, R., Alfano, S., & Giannatiempo, G. (2023). Rainfall conditions leading to runoff-initiated post-fire debris flows in Campania, Southern Italy. *Geomorphology*, 423, 108557.  
590 <https://doi.org/10.1016/j.geomorph.2022.108557>
- Fowler, H. J., Lenderink, G., Prein, A. F., Westra, S., Allan, R. P., Ban, N., Barbero, R., Berg, P., Blenkinsop, S., Do, H. X., Guerreiro, S., Haerter, J. O., Kendon, E. J., Lewis, E., Schaer, C., Sharma, A., Villarini, G., Wasko, C., & Zhang, X. (2021). Anthropogenic intensification of short-duration rainfall extremes. *Nature Reviews Earth & Environment*, 2(2), 107–122. <https://doi.org/10.1038/s43017-020-00128-6>
- 595 Gorr, A. N., McGuire, L. A., Youberg, A. M., Beers, R., & Liu, T. (2023). Inundation and flow properties of a runoff-generated debris flow following successive high-severity wildfires in northern Arizona, USA. *Earth Surface Processes and Landforms*, 49(2), 622–641. <https://doi.org/10.1002/esp.5724>
- Gupta, H. V., Kling, H., Yilmaz, K. K., & Martinez, G. F. (2009). Decomposition of the mean squared error and NSE performance criteria: Implications for improving hydrological modelling. *Journal of Hydrology*, 377(1-2), 80–91.  
600 <https://doi.org/10.1016/j.jhydrol.2009.08.003>



- Hoch, O. J., McGuire, L. A., Youberg, A. M., & Rengers, F. K. (2021). Hydrogeomorphic Recovery and Temporal Changes in Rainfall Thresholds for Debris Flows Following Wildfire. *Journal of Geophysical Research: Earth Surface*, 126(12). <https://doi.org/10.1029/2021jf006374>
- 605 Kean, J. W., & Staley, D. M. (2021). Forecasting the Frequency and Magnitude of Postfire Debris Flows Across Southern California. *Earth's Future*, 9(3). <https://doi.org/10.1029/2020ef001735>
- Kean, J. W., Staley, D. M., Lancaster, J. T., Rengers, F. K., Swanson, B. J., Coe, J. A., Hernandez, J. L., Sigman, A. J., Allstadt, K. E., & Lindsay, D. N. (2019). Inundation, flow dynamics, and damage in the 9 January 2018 Montecito debris-flow event, California, USA: Opportunities and challenges for post-wildfire risk assessment. *Geosphere*, 15(4), 1140–1163. <https://doi.org/10.1130/ges02048.1>
- 610 Lancaster, J. T., Swanson, B. J., Lukashov, S. G., Oakley, N. S., Lee, J. B., Spangler, E. R., Hernandez, J. L., Olson, B. P. E., DeFrisco, M. J., Lindsay, D. N., Schwartz, Y. J., McCrea, S. E., Roffers, P. D., & Tran, C. M. (2021). Observations and Analyses of the 9 January 2018 Debris-Flow Disaster, Santa Barbara County, California. *Environmental and Engineering Geoscience*, 27(1), 3–27. <https://doi.org/10.2113/eeg-d-20-00015>
- Li, C., Handwerger, A. L., Wang, J., Yu, W., Li, X., Finnegan, N. J., Xie, Y., Buscarnera, G., & Horton, D. L. (2022). Augmentation of WRF-Hydro to simulate overland-flow- and streamflow-generated debris flow susceptibility in burn scars. *Natural Hazards and Earth System Sciences*, 22(7), 2317–2345. <https://doi.org/10.5194/nhess-22-2317-2022>
- 615 Liu, T., McGuire, L. A., A. Youberg, Gorr, A., & Rengers, F. K. (2023). Guidance for parameterizing post-fire hydrologic models with in situ infiltration measurements. *Earth Surface Processes and Landforms*, 48(12), 2368–2386. <https://doi.org/10.1002/esp.5633>
- 620 Liu, T., McGuire, L. A., Oakley, N., & Cannon, F. (2022). Temporal changes in rainfall intensity–duration thresholds for post-wildfire flash floods in southern California. *Natural Hazards and Earth System Sciences*, 22(2), 361–376. <https://doi.org/10.5194/nhess-22-361-2022>
- Liu, T., McGuire, L. A., Wei, H., Rengers, F. K., Gupta, H., Ji, L., & Goodrich, D. C. (2021). The timing and magnitude of changes to Hortonian overland flow at the watershed scale during the post-fire recovery process. *Hydrological Processes*, 35(5). <https://doi.org/10.1002/hyp.14208>
- 625 Larson-Nash, S. S., Robichaud, P. R., Pierson, F. B., Moffet, C. A., Williams, C. J., Spaeth, K. E., Brown, R. E., & Lewis, S. A. (2018). Recovery of small-scale infiltration and erosion after wildfires. *Journal of Hydrology and Hydromechanics*, 66(3), 261–270. <https://doi.org/10.1515/johh-2017-0056>
- Martel, J.-L., Brissette, F. P., Lucas-Picher, P., Troin, M., & Arsenault, R. (2021). Climate Change and Rainfall Intensity–Duration–Frequency Curves: Overview of Science and Guidelines for Adaptation. *Journal of Hydrologic Engineering*, 26(10), 03121001. [https://doi.org/10.1061/\(asce\)he.1943-5584.0002122](https://doi.org/10.1061/(asce)he.1943-5584.0002122)
- 630 McGuire, L.A., Ebel, B.A., Rengers, F.K. Vieira, D.C.S., Nyman, P. (2024). Fire effects on geomorphic processes. *Nat Rev Earth Environ*. <https://doi.org/10.1038/s43017-024-00557-7>
- McGuire, L. A., Rengers, F. K., Oakley, N., Kean, J. W., Staley, D. M., Tang, H., de Orla-Barile, M., & Youberg, A. M.





- 635 (2021). Time Since Burning and Rainfall Characteristics Impact Post-Fire Debris-Flow Initiation and Magnitude. *Environmental and Engineering Geoscience*, 27(1), 43–56. <https://doi.org/10.2113/eeg-d-20-00029>
- McLin, S. G., Springer, E. P., & Lane, L. J. (2001). Predicting floodplain boundary changes following the Cerro Grande wildfire. *Hydrological Processes*, 15(15), 2967–2980. <https://doi.org/10.1002/hyp.385>
- Meles, M. B., Goodrich, D. C., Unkrich, C. L., Gupta, H. V., I. Shea Burns, Hirpa, F. A., Razavi, S., & D. Phillip Guertin.
- 640 (2024). Rainfall distributional properties control hydrologic model parameter importance. *Journal of Hydrology. Regional Studies*, 51, 101662–101662. <https://doi.org/10.1016/j.ejrh.2024.101662>
- Moody, J. A., & Martin, D. A. (2001a). Initial hydrologic and geomorphic response following a wildfire in the Colorado Front Range. *Earth Surface Processes and Landforms*, 26(10), 1049–1070. <https://doi.org/10.1002/esp.253>
- Moody, J. A., & Martin, D. A. (2001b). Post-fire, rainfall intensity-peak discharge relations for three mountainous
- 645 watersheds in the western USA. *Hydrological Processes*, 15(15), 2981–2993. <https://doi.org/10.1002/hyp.386>
- Moody, J. A., Shakesby, R. A., Robichaud, P. R., Cannon, S. H., & Martin, D. A. (2013). Current research issues related to post-wildfire runoff and erosion processes. *Earth-Science Reviews*, 122, 10–37. <https://doi.org/10.1016/j.earscirev.2013.03.004>
- Noske, P. J., Nyman, P., Lane, P. N. J., & Sheridan, G. J. (2016). Effects of aridity in controlling the magnitude of runoff
- 650 and erosion after wildfire. *Water Resources Research*, 52(6), 4338–4357. <https://doi.org/10.1002/2015wr017611>
- Nyman, P., Sheridan, G. J., Smith, H. G., & Lane, P. N. J. (2011). Evidence of debris flow occurrence after wildfire in upland catchments of south-east Australia. *Geomorphology*, 125(3), 383–401. <https://doi.org/10.1016/j.geomorph.2010.10.016>
- O’Neill, B. C., Tebaldi, C., van Vuuren, D. P., Eyring, V., Friedlingstein, P., Hurtt, G., Knutti, R., Kriegler, E., Lamarque, J.-
- 655 F., Lowe, J., Meehl, G. A., Moss, R., Riahi, K., & Sanderson, B. M. (2016). The Scenario Model Intercomparison Project (ScenarioMIP) for CMIP6. *Geoscientific Model Development*, 9(9), 3461–3482. <https://doi.org/10.5194/gmd-9-3461-2016>
- Oakley, N. S. (2021). A Warming Climate Adds Complexity to Post-Fire Hydrologic Hazard Planning. *Earth’s Future*, 9(7). <https://doi.org/10.1029/2021ef002149>
- 660 Osborn, H. B., Renard, K. G., & Simanton, J. R. (1979). Dense networks to measure convective rainfall in the southwestern United States. *Water Resources Research*, 15(6), 1701–1711. <https://doi.org/10.1029/wr015i006p01701>
- Osborn, H. B., & Reynolds, W. N. (1963). Convective storm patterns in the southwestern United States. *International Association of Scientific Hydrology. Bulletin*, 8(3), 71–83. <https://doi.org/10.1080/02626666309493339>
- Paretti, N. V., Kennedy, J. R., Turney, L. A., & Veilleux, A. G. (2014). *Methods for estimating magnitude and frequency of*
- 665 *floods in Arizona, developed with unregulated and rural peak-flow data through water year 2010, 2014-5211* (pp. 1–61). Geological Survey Scientific Investigations Report. <https://doi.org/10.3133/sir20145211>
- Parlange, J. Y., Lisle, I., Braddock, R. D., & Smith, R. E. (1982). THE THREE-PARAMETER INFILTRATION EQUATION. *Soil Science*, 133(6), 337–341. <https://doi.org/10.1097/00010694-198206000-00001>



- 670 Parson, A., Robichaud, P. R., Lewis, S., Napper, C., & Clark, J. (2010). *Field guide for mapping post-fire soil burn severity*.  
U.S. Department of Agriculture, Forest Service, Rocky Mountain Research Station. <https://doi.org/10.2737/rmrs-gtr-243>
- Perica, S., S. Dietz, S. Heim, L. Hiner, K. Maitaria, D. Martin, S. Pavlovic, I. Roy, C. Trypaluk, and D. Unruh (2011), NOAA Atlas 14 precipitation-frequency Atlas of the United States volume 6 version 2.0, California, US Department of Commerce, National Oceanic and Atmospheric Administration, National Weather Service, Silver Spring, Md.
- 675 Perkins, J. P., Carlos, D., Skye, C., Corina, C., Stock, J., Prancevic, J. P., Micheli Elisabeth, & Jay, J. (2022). Multi-Stage Soil-Hydraulic Recovery and Limited Ravel Accumulations Following the 2017 Nuns and Tubbs Wildfires in Northern California. *Journal of Geophysical Research: Earth Surface*, 127(6). <https://doi.org/10.1029/2022jf006591>
- Pierce, D. W., Cayan, D. R., Feldman, D. R., & Risser, M. D. (2023). Future Increases in North American Extreme Precipitation in CMIP6 Downscaled with LOCA. *Journal of Hydrometeorology*, 24(5), 951–975.
- 680 <https://doi.org/10.1175/jhm-d-22-0194.1>
- Prein, A. F., Rasmussen, R. M., Ikeda, K., Liu, C., Clark, M. P., & Holland, G. J. (2016). The future intensification of hourly precipitation extremes. *Nature Climate Change*, 7(1), 48–52. <https://doi.org/10.1038/nclimate3168>
- Razavi, S., & Gupta, H. V. (2015). What do we mean by sensitivity analysis? The need for comprehensive characterization of “global” sensitivity in Earth and Environmental systems models. *Water Resources Research*, 51(5), 3070–3092.
- 685 <https://doi.org/10.1002/2014wr016527>
- Razavi, S., & Gupta, H. V. (2016a). A new framework for comprehensive, robust, and efficient global sensitivity analysis: 1. Theory. *Water Resources Research*, 52(1), 423–439. <https://doi.org/10.1002/2015wr017558>
- Razavi, S., & Gupta, H. V. (2016b). A new framework for comprehensive, robust, and efficient global sensitivity analysis: 2. Application. *Water Resources Research*, 52(1), 440–455. <https://doi.org/10.1002/2015wr017559>
- 690 Robichaud, P. R., Wagenbrenner, J. W., Pierson, F. B., Spaeth, K. E., Ashmun, L. E., & Moffet, C. A. (2016). Infiltration and interrill erosion rates after a wildfire in western Montana, USA. *CATENA*, 142, 77–88.
- <https://doi.org/10.1016/j.catena.2016.01.027>
- Saxe, S., Hogue, T. S., & Hay, L. (2018). Characterization and evaluation of controls on post-fire streamflow response across western US watersheds. *Hydrology and Earth System Sciences*, 22(2), 1221–1237.
- 695 <https://doi.org/10.5194/hess-22-1221-2018>
- Schmidt, K. M., Hanshaw, M. N., Howle, J. F., Kean, J. W., Staley, D. M., Stock, J. D., & Bawden, G. W. (2011). Hydrologic conditions and terrestrial laser scanning of post-fire debris flows in the San Gabriel Mountains, CA, U.S.A.
- Schneider, D. P., Deser, C., Fasullo, J., & Trenberth, K. E. (2013). Climate Data Guide Spurs Discovery and Understanding. *Eos, Transactions American Geophysical Union*, 94(13), 121–122. <https://doi.org/10.1002/2013eo130001>
- 700 Senande-Rivera, M., Insua-Costa, D., & Miguez-Macho, G. (2022). Spatial and temporal expansion of global wildland fire activity in response to climate change. *Nature Communications*, 13(1), 1208. <https://doi.org/10.1038/s41467-022->



- [28835-2](#)
- Shakesby, R., & Doerr, S. (2006). Wildfire as a hydrological and geomorphological agent. *Earth-Science Reviews*, 74(3-4),  
705 269–307.
- Sheikholeslami, R., & Razavi, S. (2017). Progressive Latin Hypercube Sampling: An efficient approach for robust sampling-  
based analysis of environmental models. *Environmental Modelling & Software*, 93, 109–126.  
<https://doi.org/10.1016/j.envsoft.2017.03.010>
- Singleton, M. P., Thode, A. E., Sánchez Meador, A. J., & Iniguez, J. M. (2019). Increasing trends in high-severity fire in the  
710 southwestern USA from 1984 to 2015. *Forest Ecology and Management*, 433, 709–719.  
<https://doi.org/10.1016/j.foreco.2018.11.039>
- Staley, D. M., Kean, J. W., Cannon, S. H., Schmidt, K. M., & Laber, J. L. (2012). Objective definition of rainfall intensity-  
duration thresholds for the initiation of post-fire debris flows in southern California. *Landslides*, 10(5), 547–562.  
<https://doi.org/10.1007/s10346-012-0341-9>
- 715 Stooft, C. R., Vervoort, R. W., Iwema, J., van den Elsen, E., Ferreira, A. J. D., & Ritsema, C. J. (2012). Hydrological  
response of a small catchment burned by experimental fire. *Hydrology and Earth System Sciences*, 16(2), 267–285.  
<https://doi.org/10.5194/hess-16-267-2012>
- Tang, H., McGuire, L. A., Rengers, F. K., Kean, J. W., Staley, D. M., & Smith, J. B. (2019). Developing and Testing  
Physically Based Triggering Thresholds for Runoff-Generated Debris Flows. *Geophysical Research Letters*, 46(15),  
720 8830–8839. <https://doi.org/10.1029/2019gl083623>
- Thomas, M. A., Rengers, F. K., Kean, J. W., McGuire, L. A., Staley, D. M., Barnhart, K. R., & Ebel, B. A. (2021).  
Postwildfire Soil-Hydraulic Recovery and the Persistence of Debris Flow Hazards. *Journal of Geophysical Research:  
Earth Surface*, 126(6). <https://doi.org/10.1029/2021jf006091>
- Westra, S., Fowler, H. J., Evans, J. P., Alexander, L. V., Berg, P., Johnson, F., Kendon, E. J., Lenderink, G., & Roberts, N.  
725 M. (2014). Future changes to the intensity and frequency of short-duration extreme rainfall. *Reviews of Geophysics*,  
52(3), 522–555. <https://doi.org/10.1002/2014rg000464>
- Woolhiser, D. A., & Liggett, J. A. (1967). Unsteady, one-dimensional flow over a plane-The rising hydrograph. *Water  
Resources Research*, 3(3), 753–771. <https://doi.org/10.1029/wr003i003p00753>
- Wu, J., Nunes, J. P., Baartman, J. E. M., & Faúndez Urbina, C. A. (2021). Testing the impacts of wildfire on hydrological  
730 and sediment response using the OpenLISEM model. Part 1: Calibration and evaluation for a burned Mediterranean  
forest catchment. *CATENA*, 207, 105658. <https://doi.org/10.1016/j.catena.2021.105658>
- Xu, Z., Zhang, Y., Günter Blöschl, & Piao, S. (2023). Mega Forest Fires Intensify Flood Magnitudes in Southeast Australia.  
*Geophysical Research Letters*, 50(12). <https://doi.org/10.1029/2023gl103812>
- Yu, G., Liu, T., McGuire, L. A., Wright, D. B., Hatchett, B. J., Miller, J. J., Berli, M., Giovando, J., Bartles, M., & Floyd, I.  
735 E. (2023). Process-Based Quantification of the Role of Wildfire in Shaping Flood Frequency. *Water Resources  
Research*, 59(12). <https://doi.org/10.1029/2023wr035013>
